# Supplementary material for: Characterization of a transgenic mouse model exhibiting spontaneous lung adenocarcinomas with a metastatic phenotype
Source: PubMed Central journal article supplement (PMC5395147; doi:10.1371/journal.pone.0175586), 2017-04-18
Supplement: pone.0175586.s003.pdf [file pone.0175586.s003.pdf]

**S1 Table****qRT-PCR primer sequences of EMT transcriptional factors and candidate genes**

| <b>Gene</b> | <b>Primer</b>                                      |
|-------------|----------------------------------------------------|
| SNAIL1      | F: ctggtgagaagccattctcc<br>R: ggaagatgccagcgaggatg |
| SNAIL2      | F: cctggctgcttcaaggacac<br>R: cactcagtgtgccacacagc |
| TWIST1      | F: ctggactccaagatggcaag<br>R: ccagagtctctagactgtcc |
| TWIST2      | F: gatgaccagctgcagctacg<br>R: ccacaaggttgccaggtgc  |
| ZEB1        | F: ccagtgaaggtgatccagcc<br>R: gaggcctcttacctgtgtgc |
| ZEB2        | F: gctcctactcgcagcacatg<br>R: cctccttctcgtgctccttc |
| ADORA1      | F: ctattcacagcctgggactc<br>R: ccaaggttgacttctctgg  |
| AHR         | F: ctccctgtaatcagcctctg<br>R: ctgatacatggacatggccc |
| BPIFA1      | F: ctctgggcttgacactcaac<br>R: caggagtgactccattgagc |
| C5AR1       | F: catctgctacaccttctcc<br>R: cacagggagttcagcttctc  |
| CCL11       | F: gggaatatcagcaccagtcg<br>R: ctggtccattgtgttctc   |
| CCL24       | F: ctctgtccctgaacttgac<br>R: cacaggagacaccagaactc  |
| CCL28       | F: gagctagctctacatcccag<br>R: gccaggttctcagtgctag  |
| CD86        | F: cagagtgaaggcagtgagag<br>R: gatgtctgctcctggcatag |
| CFB         | F: gtctgatgagaggagtagcg<br>R: cgggttctattccagccttc |
| IL33        | F: gacttcagaagagcaggcac<br>R: gtcagtctttgcagcagctg |

|         |                                                    |
|---------|----------------------------------------------------|
| LYZ1    | F: ctactgcagcccattctgtc<br>R: ctgtgttggtgactgtcac  |
| PLA2G4A | F: cagctccgacagtgatgatg<br>R: gctcgtcatcgaaggaatcc |
| GAPDH   | F: cctggccaaggtcatccatg<br>R: cagctctgggatgaccttgc |
