# Supplementary material for: Characterization of a transgenic mouse model exhibiting spontaneous lung adenocarcinomas with a metastatic phenotype
Source: PubMed Central journal article supplement (PMC5395147; doi:10.1371/journal.pone.0175586), 2017-04-18
Supplement: pone.0175586.s004.pdf [file pone.0175586.s004.pdf]

## S2 Table

IPA analyzed genes related to cellular movement and migration.

| Symbol     | Entrez Gene Name                                                                  | Exp Log Ratio | MIFTS* of Lung Cancer |
|------------|-----------------------------------------------------------------------------------|---------------|-----------------------|
| ADORA1     | adenosine A1 receptor                                                             | -1.367        | ND                    |
| PLA2G4A    | phospholipase A2, group IVA (cytosolic, calcium-dependent)                        | -1.262        | ND                    |
| <u>AHR</u> | aryl hydrocarbon receptor                                                         | -1.036        | 94                    |
| <u>LYZ</u> | lysozyme                                                                          | 1.011         | 94                    |
| STAT3      | signal transducer and activator of transcription 3                                | 1.014         | 94                    |
| TP63       | tumor protein p63                                                                 | 1.043         | 94                    |
| CCL24      | chemokine (C-C motif) ligand 24                                                   | 1.054         | ND                    |
| C5AR1      | complement component 5a receptor 1                                                | 1.074         | ND                    |
| CXCL12     | chemokine (C-X-C motif) ligand 12                                                 | 1.083         | 94                    |
| FHIT       | fragile histidine triad                                                           | 1.166         | 94                    |
| CCL11      | chemokine (C-C motif) ligand 11                                                   | 1.185         | ND                    |
| CTSS       | cathepsin S                                                                       | 1.226         | ND                    |
| MMP14      | matrix metalloproteinase 14 (membrane-inserted)                                   | 1.237         | ND                    |
| CCL5       | chemokine (C-C motif) ligand 5                                                    | 1.243         | 94                    |
| PIK3CG     | phosphatidylinositol-4,5-bisphosphate 3-kinase, catalytic subunit gamma           | 1.244         | ND                    |
| SOCS3      | suppressor of cytokine signaling 3                                                | 1.278         | 94                    |
| CD86       | CD86 molecule                                                                     | 1.301         | ND                    |
| IGFBP3     | insulin-like growth factor binding protein 3                                      | 1.324         | ND                    |
| IL33       | interleukin 33                                                                    | 1.436         | ND                    |
|            |                                                                                   |               | 47                    |
|            |                                                                                   |               | (pulmonary            |
| CSF2RB     | colony stimulating factor 2 receptor, beta, low-affinity (granulocyte-macrophage) |               | ary                   |
|            |                                                                                   |               | alveolar              |
|            |                                                                                   |               | proteinosis)          |
|            |                                                                                   | 1.469         |                       |
| IGF1       | insulin-like growth factor 1 (somatomedin C)                                      | 1.784         | 94                    |
|            |                                                                                   |               | 32 (lung              |
|            |                                                                                   |               | cancer                |
| SPDEF      | SAM pointed domain containing ETS transcription factor                            |               | susceptibility 3)     |
|            |                                                                                   | 1.791         |                       |

|               |                                                  |        |    |
|---------------|--------------------------------------------------|--------|----|
| CDKN1A        | cyclin-dependent kinase inhibitor 1A (p21, Cip1) | 1.800  | 94 |
| CCL2          | chemokine (C-C motif) ligand 2                   | 1.861  | 94 |
| <u>BPIFA1</u> | BPI fold containing family A, member 1           | 2.224  | 94 |
| IL6           | interleukin 6                                    | 2.416  | ND |
| CCL28         | chemokine (C-C motif) ligand 28                  | 2.892  | ND |
| TNF           | tumor necrosis factor                            | 3.027  | 94 |
| MMP3          | matrix metalloproteinase 3                       | 3.171  | ND |
| CXCL2         | chemokine (C-X-C motif) ligand 2                 | 3.274  | ND |
| <u>CFB</u>    | complement factor B                              | 3.404  | 94 |
| CCL3L3        | chemokine (C-C motif) ligand 3-like 3            | 4.209  | ND |
| MMP12         | matrix metalloproteinase 12                      | 6.577  | 94 |
| CXCL3         | chemokine (C-X-C motif) ligand 3                 | 10.685 | ND |
