# Supplementary material for: Characterization of a transgenic mouse model exhibiting spontaneous lung adenocarcinomas with a metastatic phenotype
Source: PubMed Central journal article supplement (PMC5395147; doi:10.1371/journal.pone.0175586), 2017-04-18
Supplement: pone.0175586.s005.pdf [file pone.0175586.s005.pdf]

### S3 Table

Statistics of key transcriptional factors of EMT from real-time qPCR of Tg-3m and Tg-6m cell lines.

| Genes  | Average Cq (triplicate) |       | SD   | P value    |
|--------|-------------------------|-------|------|------------|
|        | Tg-3m                   | Tg-6m |      |            |
| Snail1 | 30.16                   | 27.64 | 1.78 | **p<0.01   |
| Snail2 | 23.09                   | 17.18 | 4.18 | ***p<0.001 |
| Twist1 | 26.47                   | 20.34 | 4.33 | ***p<0.001 |
| Twist2 | 25.32                   | 20.96 | 3.08 | ***p<0.001 |
| Zeb1   | 21.4                    | 17.64 | 2.66 | ***p<0.001 |
| Zeb2   | 24.9                    | 21.48 | 2.42 | ***p<0.001 |
