# Supplementary material for: Characterization of a transgenic mouse model exhibiting spontaneous lung adenocarcinomas with a metastatic phenotype
Source: PubMed Central journal article supplement (PMC5395147; doi:10.1371/journal.pone.0175586), 2017-04-18
Supplement: pone.0175586.s006.pdf [file pone.0175586.s006.pdf]

#### S4 Table

Statistics of candidate genes associated with EMT from real-time qPCR of Tg-3m and Tg-6m cell lines.

| Genes   | Average Cq (triplicate) |       | SD   | P value    |
|---------|-------------------------|-------|------|------------|
|         | Tg-3m                   | Tg-6m |      |            |
| ADORA1  | 29.55                   | 24.45 | 3.61 | ***p<0.001 |
| AHR     | 24.06                   | 23.24 | 0.58 | ***p<0.001 |
| BPIFA1  | 34.16                   | 30.3  | 2.73 | **p<0.01   |
| C5AR1   | 28.28                   | 23.73 | 3.22 | ***p<0.001 |
| CCL24   | 32.07                   | 28.28 | 2.68 | ***p<0.001 |
| CCL28   | 28.61                   | 24.16 | 3.14 | **p<0.01   |
| CCL3L3  | 35.83                   | 30.1  | 4.05 | *p<0.05    |
| CD86    | 30.85                   | 26.66 | 2.96 | **p<0.01   |
| CFB     | 28.61                   | 23.47 | 3.64 | ***p<0.001 |
| IL33    | 21.02                   | 17.4  | 2.56 | ***p<0.001 |
| LYZ     | 28.45                   | 23.55 | 3.46 | ***p<0.001 |
| PLA2G4A | 23.38                   | 18.31 | 3.59 | ***p<0.001 |
| IL6     | 27.65                   | 24.16 | 2.47 | **p<0.01   |
